**Title:** Mice lacking NF- $\kappa$ B1 exhibit marked DNA damage responses and more severe gastric pathology in response to parenteral tamoxifen administration.

**Running title:** NF- $\kappa$ B1 regulates tamoxifen induced gastric disease

**Authors:**

Michael D Burkitt<sup>1\*</sup>, Jonathan M Williams<sup>2</sup>, Tristan Townsend<sup>1</sup>, Rachael Hough<sup>1</sup>, Carrie A Duckworth<sup>1</sup>, D Mark Pritchard<sup>1\*</sup>

1: Department of Cellular and Molecular Physiology, University of Liverpool, Liverpool, UK

2: Pathology and Pathogen Biology, Royal Veterinary College, North Mymms, UK

\*Corresponding Authors

**Correspondence addresses:**

Dr Michael D Burkitt and Prof D Mark Pritchard  
Department of Cellular and Molecular Physiology,  
Institute of Translational Medicine,  
University of Liverpool,  
The Henry Wellcome Laboratory,  
Nuffield Building,  
Crown St.,  
Liverpool.  
L69 3GE

burkitt@liverpool.ac.uk  
mark.pritchard@liverpool.ac.uk

# Abstract

**Background:** The estrogen receptor antagonist tamoxifen has recently been shown to cause acute gastric atrophy and metaplasia in mice. We have previously demonstrated that the outcome of *Helicobacter felis* infection, which induces similar gastric lesions in mice, is altered by deletion of specific NF- $\kappa$ B subunits. *Nfkb1*<sup>-/-</sup> mice developed more severe gastric atrophy than wild-type (WT) mice 6 weeks after *H. felis* infection. In contrast, *Nfkb2*<sup>-/-</sup> mice were protected from developing this pathology. We therefore hypothesized that gastric lesions induced by tamoxifen may be similarly regulated by signaling via NF- $\kappa$ B subunits.

**Methods:** Groups of 5 female C57BL/6 (WT), *Nfkb1*<sup>-/-</sup>, *Nfkb2*<sup>-/-</sup> and *c-Rel*<sup>-/-</sup> mice were administered 150mg/kg tamoxifen by IP injection. 72 hours later, gastric corpus tissues were taken for quantitative histological assessment. In addition, groups of 6 female WT and *Nfkb1*<sup>-/-</sup> mice were exposed to 12Gy  $\gamma$ -irradiation. Gastric epithelial apoptosis was quantified 6 and 48 hours after irradiation.

**Results:** Tamoxifen induced gastric epithelial lesions in all strains of mice, but this was more severe in *Nfkb1*<sup>-/-</sup> mice than WT mice. *Nfkb1*<sup>-/-</sup> mice exhibited more severe parietal cell loss than WT mice, had increased gastric epithelial expression of Ki67 and had an exaggerated gastric epithelial DNA damage response as quantified by  $\gamma$ H2AX. To determine whether the difference in gastric epithelial DNA damage response of *Nfkb1*<sup>-/-</sup> mice was unique to tamoxifen, or a generic consequence of DNA damage, we also assessed gastric epithelial apoptosis following  $\gamma$ -irradiation. 6 hours after  $\gamma$ -irradiation, gastric epithelial apoptosis was increased in the gastric corpus and antrum of *Nfkb1*<sup>-/-</sup> mice relative to WT.

**Conclusions:** NF- $\kappa$ B1 mediated signaling regulates the development of gastric mucosal pathology following tamoxifen administration. This is associated with an exaggerated gastric epithelial DNA damage response. This aberrant response reflects a more generic sensitization of the gastric mucosa of *Nfkb1*<sup>-/-</sup> mice to DNA damage.

56     **Keywords:** Tamoxifen, Stomach, NF-kappaB, DNA damage

57

## 58 Introduction

59 The development of gastric cancer in humans is strongly associated with gastric colonization with  
60 *Helicobacter pylori*<sup>1</sup>. This infection leads, in a minority of people, to a stereotypical pre-neoplastic  
61 cascade of pathology which develops over several decades. This cascade is typified by gastric oxyntic  
62 gland atrophy, gastric epithelial metaplasia, dysplasia and cancer<sup>2</sup>. These events can be modelled by  
63 infecting C57BL/6 mice with the related bacterium *H. felis*. In this model, advanced gastric pre-  
64 neoplasia develops over 12 months and, in some hands, malignancies have been reported in animals  
65 aged 13-15 months<sup>3,4</sup>.

66 The development of gastric pre-neoplasia in response to gastric *Helicobacter* infection occurs on the  
67 background of chronic inflammation of the gastric mucosa. The signaling pathways that regulate  
68 gastric epithelial remodeling in response to chronic inflammation are complex and have not been  
69 fully elucidated. However a wealth of evidence suggests that signaling through NF-κB pathways is  
70 involved in the development of inflammation associated malignancies both in the stomach, and in  
71 other parts of the gastrointestinal tract<sup>5</sup>. The NF-κB pathways are a group of related signaling  
72 pathways that are triggered by a wide variety of intra- and extracellular events, and lead to the  
73 regulation of transcription through the activity of homo- or hetero-dimers of the five NF-κB sub-units  
74 (RelA (p65), RelB, c-Rel, NF-κB1 (p50) and NF-κB2 (p52)) (see Merga *et al* for a recent review of these  
75 pathways<sup>5</sup>).

76 We have previously reported that *H. felis* induced gastric pre-neoplasia is differentially regulated by  
77 signaling involving specific NF-κB sub-units. Mice lacking the NF-κB1 subunit developed more severe  
78 gastric atrophy after 6 weeks of infection, and more severe pre-neoplastic pathology when infected  
79 for 12 months. *c-Rel*<sup>-/-</sup> mice developed similar epithelial pathology to WT, but 3 of 6 animals also  
80 developed earlier lymphoepithelial lesions analogous to the pre-cursor lesions of gastric MALT  
81 lymphoma. In contrast, *Nfkb2*<sup>-/-</sup> mice were entirely protected from *H. felis* induced pathology,  
82 despite heavy colonization by these bacteria<sup>6</sup>. This has also been demonstrated in the context of

83 acute inflammatory responses in the intestinal tract, where *Nfkb2*<sup>-/-</sup> mice exposed to low dose  
84 lipopolysaccharide (LPS) systemically, were protected from pathological small intestinal villus tip  
85 epithelial cell shedding and apoptosis, whereas *Nfkb1*<sup>-/-</sup> mice demonstrated more severe lesions  
86 than wild-type mice<sup>7</sup>.

87 It has recently been reported that parenteral administration of tamoxifen to mice induces an acute  
88 gastric corpus metaplasia, characterized by the loss of parietal cells, metaplastic changes originating  
89 in the chief cells at the base of the gastric glands, and increased epithelial cell proliferation<sup>8</sup>. These  
90 findings have been shown to be reproducible in other laboratories<sup>9</sup>, to be estrogen independent and  
91 reversible on discontinuation of tamoxifen. Unlike *H. felis* induced gastric pre-neoplasia, this  
92 pathology occurs with relatively little associated inflammation in the gastric mucosa<sup>10</sup>; this model  
93 therefore offers an opportunity to investigate gastric epithelial remodeling in the absence of a  
94 chronic inflammatory stimulus.

95 We have utilized this model to characterize whether the regulation of gastric pre-neoplasia by mice  
96 lacking specific NF-κB sub-units is a generic response to gastric epithelial remodeling, or specific to  
97 the events induced by *H. felis* infection.

98

## 99 **Results**

### 100 *Tamoxifen induced gastric corpus pathology is regulated by Nfkb1*

101 To characterize whether deletion of specific NF-κB sub-units altered the severity of pathology  
102 induced by administration of tamoxifen, groups of 5, 12-week old, WT, *Nfkb1*<sup>-/-</sup>, *Nfkb2*<sup>-/-</sup> and *c-Rel*<sup>-/-</sup>  
103 female mice were either treated with tamoxifen, or vehicle and culled 72 hours later. Gastric  
104 pathology was scored using an established scoring system<sup>11</sup>. Vehicle treated mice of all genotypes  
105 exhibited minimal gastric lesions (Figures 1 and 2A). Following administration of tamoxifen  
106 morphological changes were seen in the corpus mucosa of all groups of mice. Tamoxifen treated WT

mice had mean pathology scores of 2.4 (+/- 0.51 SEM). *Nfkb2*<sup>-/-</sup> and *c-Rel*<sup>-/-</sup> mice exhibited similar pathology scores, whilst *Nfkb1*<sup>-/-</sup> mice exhibited more severe gastric lesions with a mean score of 4.8 (+/-0.74, *p*<0.01 by 2-way ANOVA and Dunnett's *post-hoc* test).

To quantify the degree of gastric atrophy induced by tamoxifen, we assessed the number of H<sup>+</sup>/K<sup>+</sup>ATPase expressing cells. Amongst untreated mice, no significant differences in the number or distribution of parietal cells were identified between the mice of different genotypes. 31.2% of cells in the gastric corpus of untreated WT mice expressed H<sup>+</sup>/K<sup>+</sup>ATPase (Figures 1 and 2B), and cells were distributed between cell positions 2 and 36 of the gastric gland, with peak prevalence at cell position 15 (Figure 2C).

Following administration of tamoxifen, the number of H<sup>+</sup>/K<sup>+</sup>ATPase expressing cells did not differ substantially in WT mice, but a shift in parietal cell distribution up the gland was noted (significantly greater numbers of parietal cells observed between cell positions 18 and 36 in tamoxifen treated mice, *p*<0.05 by modified median testing, Figure 2C). In keeping with the visual analogue scoring of gastric lesions, similar numbers and distributions of H<sup>+</sup>/K<sup>+</sup>ATPase expressing cells were identified in the corpus of *Nfkb2*<sup>-/-</sup> and *c-Rel*<sup>-/-</sup> mice that had been exposed to tamoxifen (Figure 2B, E and F). In contrast, *Nfkb1*<sup>-/-</sup> mice showed more marked changes in parietal cell distribution than their WT counterparts, with a 2.4-fold reduction in parietal cell number (*p*<0.001 by 2-way ANOVA and Dunnett's *post-hoc* analysis, Figure 2B), and a marked reduction in parietal cell abundance between cell positions 4 and 13 of gastric corpus glands (*p*<0.05 by modified median testing, Figure 2D).

#### *Nfkb1 mediated signaling regulates tamoxifen induced cell proliferation*

To determine whether NF-κB signaling influenced gastric epithelial cell turnover following the administration of tamoxifen, we quantified cells expressing the S-phase marker Ki67, and those undergoing apoptosis by expression of cleaved-caspase 3.

In untreated mice, genotype did not significantly influence the number of cleaved-caspase 3 positive cells, which were relatively rare occurrences (1.4+/-0.68 SEM cells per high power (x40 objective) field; HPF). However, there was a trend towards more apoptosis in both *Nfkb1*<sup>-/-</sup> and *Nfkb2*<sup>-/-</sup> mice. Administration of tamoxifen to WT mice increased the number of cleaved-caspase 3 positive cells 3.4-fold, but this did not reach statistical significance (Figure 3A and B). In both *Nfkb1*<sup>-/-</sup> and *Nfkb2*<sup>-/-</sup> mice tamoxifen induced apoptosis in a larger number of epithelial cells than in WT mice (3.9- and 4.8- fold,  $p<0.05$  and  $p<0.01$  respectively).

In untreated WT mice 18.1% (+/-0.7) of gastric corpus epithelial cells were in S-phase. These cells were distributed between cell positions 5 and 32, with peak proliferative index being observed at cell positions 15 and 16. Proliferating gastric epithelial cells were more abundant in untreated *Nfkb1*<sup>-/-</sup> mice, compared to WT (26.6% +/-1.9,  $p<0.05$  by 2-way ANOVA and Dunnett's post-hoc test); in this genotype, the peak proliferative index was observed at cell position 14, and cells in S-phase were observed between cell positions 2 and 29. Other untreated transgenic mice exhibited similar proliferation indices to WT mice.

Following tamoxifen treatment, the number of proliferating cells observed in WT mice increased 1.8-fold ( $p<0.01$ , Figures 3A, C and D). This increase was recapitulated in other genotypes of mice (Figures 3A, C, E, F and G), but was more pronounced in *Nfkb1*<sup>-/-</sup> mice than other groups, where a 2.4-fold increase in proliferating cells was observed ( $p<0.0001$  compared with tamoxifen treated WT mice, Figure 3C). In these animals, proliferating cells were observed between cell positions 2 and 52, with peak proliferative index at cell position 16.

#### *Nfkb1 regulates tamoxifen induced DNA damage in the gastric epithelium.*

To investigate the mechanism underlying differences in sensitivity to tamoxifen induced gastric pathology we assessed whether there were any aberrant DNA damage responses. Whilst tamoxifen is best characterized as an anti-estrogen receptor drug, it is also a genotoxic agent. DNA damage induced by tamoxifen is associated both with the formation of tamoxifen/DNA adducts, and with the

induction of oxidative stress by tamoxifen metabolites<sup>12</sup>. This mechanism has been hypothesized to be of clinical relevance in patients treated with tamoxifen, who have an increased risk of some malignancies, including endometrial cancer<sup>13</sup>. We hypothesized therefore, that this effect may also influence the degree of gastric pathology induced by tamoxifen.

To quantify this, we immunostained tissue sections using a phospho-specific antibody targeting  $\gamma$ -H2AX. Expression of this antigen reflects the DNA damage response in the cell. In untreated gastric corpus mucosa,  $\gamma$ -H2AX was identified in 2.8% of WT epithelial cells. All untreated transgenic groups had similar percentages of  $\gamma$ -H2AX labelled cells to wild-type mice (Figure 4A-F). There was a small increase in abundance of  $\gamma$ -H2AX following tamoxifen treatment of WT mice (4.6%), but this did not reach statistical significance. A similar trend towards increased abundance of  $\gamma$ -H2AX was observed in *Nfkb2*<sup>-/-</sup> and *c-Rel*<sup>-/-</sup> mice administered tamoxifen. In contrast, the percentage of  $\gamma$ -H2AX labelled cells increased 4.0-fold in *Nfkb1*<sup>-/-</sup> mice administered tamoxifen ( $p < 0.001$ , Figure 4B). Excess  $\gamma$ -H2AX expression occurred over a wide gland area in this strain (between cell positions 5 and 32 of the gastric corpus gland, Figure 4D). In tamoxifen treated *Nfkb1*<sup>-/-</sup> mice,  $\gamma$ -H2AX expression was observed between cell positions 2 and 39, with peak  $\gamma$ -H2AX expression observed at cell position 20. This correlates closely to the distribution of cells in S-phase following tamoxifen treatment (Figure 3E).

#### *Nfkb1*<sup>-/-</sup> mice also have aberrant responses to $\gamma$ -irradiation induced DNA damage

We next wanted to characterize whether the differences identified in  $\gamma$ -H2AX expression in *Nfkb1*<sup>-/-</sup> mice were due specifically to altered responses to the genotoxic stress induced by tamoxifen, or represented a more generic aberrant response to DNA damage. To address this, we quantified gastric epithelial cell turnover in both the gastric corpus and antrum at baseline, and 6 and 48 hours following 12Gy  $\gamma$ -irradiation, by cell positional scoring of morphologically apoptotic and mitotic cells. This dose and time-points of  $\gamma$ -irradiation have previously been demonstrated to be optimal for the assessment of DNA damage induced apoptosis in the stomach, and morphological assessment of



H+E stained sections correlates well with other markers of apoptosis including cleaved-caspase 3 immunostaining and TUNEL staining<sup>14</sup>.

In untreated WT mice, gastric antral glands were 19.1 (+/-1.9) cells in length on average, whilst corpus glands were a mean 31.1 (+/-1.7) cells long. Deletion of *Nfkb1* did not significantly alter the length of gastric corpus glands, whilst in the antrum, gastric gland hyperplasia to a mean gland length of 24.2 cells (+/- 2.6,  $p<0.01$ ) was observed (Figures 5A and B).

An average of 0.66% (+/-0.24) of antral gland cells were mitotic in untreated WT mice, and these were distributed between cell positions 3 and 15 with peak mitotic index at cell position 7. In *Nfkb1*<sup>-/-</sup> mice the number of mitotic cells observed was higher (1.6 +/- 0.73%,  $p<0.05$ , Figure 5C), and the distribution of mitoses occurred over a wider area (cell positions 4-25), with the position of peak mitotic index shifted up the gland to cell position 14. Statistically significant increases in mitotic indices were observed between cell positions 11 and 22 in *Nfkb1*<sup>-/-</sup> compared to WT mice ( $p<0.05$ , Figure 5E).

In gastric corpus mucosa, 0.25% (+/-0.10) of cells were mitotic in WT mice (Figure 5D). These events were distributed between cell positions 10 and 31, with peak mitotic index at cell position 14 (Figures 5D and F). In *Nfkb1*<sup>-/-</sup> mice 1.1% (+/-0.29,  $p<0.0001$ ) of gastric corpus cells were mitotic and mitotic cells were distributed between cell positions 11 and 32, with peak mitotic index at cell position 19. Increased gastric corpus mitotic index ( $p<0.05$ ) was observed in *Nfkb1*<sup>-/-</sup> mice compared with WT mice between cell positions 16 and 25 (Figures 5D and F).

In untreated WT mice 0.17% (+/-0.25) of cells in the gastric antrum were identified as morphologically apoptotic; these events were distributed in low numbers from cell position 4-12. Neither the number nor the distribution of apoptotic cells was significantly different in the antrum of untreated *Nfkb1*<sup>-/-</sup> mice (Figure 6A, C and E). In the corpus of untreated WT mice, 0.04% (+/-0.04) of cells were morphologically apoptotic, and were distributed between cell positions 8 and 26. By this measure, the number of apoptotic cells in the gastric corpus was increased 4.8-fold in untreated

204 *Nfkb1*<sup>-/-</sup> mice (0.19% +/-0.15,  $p<0.05$ ), and the apoptotic cells were distributed over a marginally  
205 wider region of the corpus gland than in WT mice (cell positions 5-32) (Figure 6B, D and F).

206  $\gamma$ -irradiation entirely suppressed mitosis in the gastric tissues of both WT and *Nfkb1*<sup>-/-</sup> mice at both 6-  
207 and 48-hours post irradiation. However, six hours after  $\gamma$ -irradiation, the numbers of apoptotic cells  
208 identified in both the corpus and antrum of *Nfkb1*<sup>-/-</sup> mice were higher than in similar tissues from WT  
209 mice (Figure 6C and D). In the antrum, 2.8% (+/- 1.1) of gastric antral cells were apoptotic in WT  
210 mice, with apoptotic cells distributed between cell positions 2 and 17 and peak apoptotic index at  
211 cell position 6. Six hours after  $\gamma$ -irradiation, 4.4% (+/-1.5,  $p<0.05$ ) of antral cells were apoptotic in  
212 *Nfkb1*<sup>-/-</sup> mice, with apoptotic cells observed between cell positions 2 and 24, and peak apoptotic  
213 index at cell position 7. Significantly increased apoptosis was observed in *Nfkb1*<sup>-/-</sup> mice between cell  
214 positions 10 and 17 ( $p<0.05$ , Figure 6G).

215 Six hours after  $\gamma$ -irradiation 0.34% (+/-0.04) cells were apoptotic in the gastric corpus of WT mice,  
216 compared to 1.8% (+/-0.07) cells in *Nfkb1*<sup>-/-</sup> mice ( $p<0.0001$ ). Apoptotic cells were distributed  
217 between cell positions 9 and 28 in WT mice, with peak apoptotic indices observed at cell positions 13  
218 and 19. In *Nfkb1*<sup>-/-</sup> mice, apoptosis was observed between cell positions 6 and 33, with peak  
219 apoptosis at cell position 18. Increased apoptosis was observed in the gastric corpus of *Nfkb1*<sup>-/-</sup> mice  
220 between cell positions 9 and 25 ( $p<0.05$ , Figure 6H).

221 Forty-eight hours after  $\gamma$ -irradiation the differences in apoptotic cell number between WT and *Nfkb1*<sup>-/-</sup>  
222 mice were less marked, particularly in the gastric antrum. At this time-point 5.2% (+/-2.0) of antral  
223 epithelial cells were apoptotic in WT mice compared to 3.6% of cells in *Nfkb1*<sup>-/-</sup> mice ( $p=0.10$ , Figure  
224 6C). Apoptosis was observed in WT mice between cell positions 2 and 20, with peak apoptosis at cell  
225 position 5. The distribution of apoptosis in *Nfkb1*<sup>-/-</sup> mice was shifted slightly up the antral gland  
226 compared to WT mice, with apoptotic cells being observed between cell positions 2 and 23, and  
227 peak apoptosis at cell position 8. Increased apoptosis was observed in *Nfkb1*<sup>-/-</sup> mice between cell  
228 positions 10 and 18 ( $p<0.05$ , Figure 6I).

In the gastric corpus, 1.2% (+/-0.09) of cells were apoptotic in WT mice 48 hours after  $\gamma$ -irradiation, compared to 2.3% (+/-0.60) in *Nfkb1*<sup>-/-</sup> mice ( $p<0.05$  Figure 6D). At this time-point, apoptotic cells were observed between cell positions 4 and 30, with peak apoptosis at cell positions 17 and 18 in WT mice. In *Nfkb1*<sup>-/-</sup> mice, apoptotic cells were observed between cell positions 9 and 35, with peak apoptosis at cell position 14. Increased apoptosis was observed between cell positions 9 and 21 ( $p<0.05$ , Figure 6J).

#### *Nfkb1*<sup>-/-</sup> animals have primed extrinsic pathway apoptosis mechanisms in the gastric epithelium

To investigate the mechanisms underlying the increased gastric epithelial apoptosis in mice lacking *Nfkb1*, we extracted mRNA from mucosal samples of mice either without treatment, or 6 hours following  $\gamma$ -irradiation. We performed real-time PCR assays to quantify the expression of 8 regulators of apoptosis that have previously been shown to be under the transcriptional regulation of NF- $\kappa$ B signalling<sup>15, 16, 17, 18, 19, 20, 21</sup>. No statistically significant differences in the expression of the inhibitors of apoptosis c-IAP1, c-IAP2 or xIAP were identified (Figures 7A-C), nor were changes in the expression of p53, BCL-2 or BCL<sub>XL</sub> observed (Figures 7D-F). In contrast, Fas and FasL expression were both upregulated (1.8- and 4.8-fold,  $p<0.01$  and  $p<0.0001$  respectively, Figures 7G and H) in the gastric mucosa of untreated *Nfkb1*<sup>-/-</sup> mice compared to WT mice. Six hours after  $\gamma$ -irradiation, Fas and FasL transcript abundance increased in WT mice to levels similar to those identified in *Nfkb1*<sup>-/-</sup> mice at baseline, suggesting that this pathway is activated in response to  $\gamma$ -irradiation.

## Discussion

These data demonstrate that NF- $\kappa$ B signaling is involved in regulating the development of gastric epithelial metaplasia and atrophy following tamoxifen administration. In this model the most significant NF- $\kappa$ B subunit appears to be NF- $\kappa$ B1, as mice lacking NF- $\kappa$ B1 and c-Rel demonstrated few differences in response compared to WT mice. This contrasts with previous observations from our

own laboratory that have demonstrated differential regulation of *H. felis* induced gastric pre-neoplastic pathology in mice lacking NF- $\kappa$ B2 as well as NF- $\kappa$ B1.

The differences in gastric epithelial pathology observed in *Nfkb1*<sup>-/-</sup> mice following tamoxifen administration were associated with a more pronounced proliferative response and increased epithelial cell apoptosis. They were also associated with a marked difference in DNA damage response. Further investigation of the DNA damage responses of *Nfkb1*<sup>-/-</sup> mice also demonstrated an increased sensitivity to  $\gamma$ -irradiation induced epithelial cell apoptosis relative to WT mice. This suggests that the difference in response to tamoxifen may be part of a more generalized difference in DNA damage responses in these mice, rather than a specific tamoxifen related event. This is supported by earlier studies which have shown that 24 hours after 8Gy  $\gamma$ -irradiation, *Nfkb1*<sup>-/-</sup> mice developed more small intestinal apoptosis than WT control mice<sup>22</sup>.

The dynamics of NF- $\kappa$ B and p53 mediated signaling in response to DNA damage have been subject to systematic modelling in recent years<sup>23</sup>. This work has demonstrated that these fundamental cellular mechanisms are closely linked, and act to form a complex regulatory network for DNA damage responses. It is therefore unsurprising that abrogation of NF- $\kappa$ B signaling pathways leads to an altered DNA damage response. Nonetheless, it is striking that following tamoxifen administration this effect was almost exclusively associated with NF- $\kappa$ B1 deletion in our study.

Our real-time PCR assays adopted a candidate gene approach to try to identify specific targets of NF- $\kappa$ B signaling that might explain the differences in apoptosis that we had observed. Whilst there are inevitable compromises associated with such an approach, we did identify potential priming of the CD95/FasL pathway in untreated mice lacking NF- $\kappa$ B1. Whilst this pathway is not the most frequently studied in DNA damage induced apoptosis, there are both *in-vitro*<sup>24</sup> and *in-vivo*<sup>25</sup> studies that demonstrate its role in modulating radiation induced apoptosis.

The mechanisms underlying tamoxifen induced gastric atrophy and metaplasia remain unclear. Previous data have demonstrated that gastric epithelial cells express the estrogen receptor, and

hence a direct abrogation of signaling through this receptor is a biologically plausible mechanism for inducing gastric atrophy. However, the similarity of lesions induced in the stomach following tamoxifen with that induced by known protonophores including DMP-777 has also promoted the concept of tamoxifen acting as a direct epithelial cell toxin<sup>10</sup>. Our DNA damage assays suggest that a genotoxic mechanism may contribute to the gastric lesions induced by tamoxifen. However further studies investigating the underlying mechanism of tamoxifen induced gastric murine pathology are required.

We therefore conclude that signaling involving NF-κB1 regulates gastric epithelial pathology in response to a second model of gastric atrophy and metaplasia. As in *H. felis* infection, following tamoxifen administration, signaling mediated by NF-κB1 appears to suppress gastric epithelial cell turnover, and to suppress DNA damage responses. This is coupled with altered baseline expression of Fas and FasL in mice lacking NF-κB1, which leads to excess apoptosis following genotoxic stress.

In the current study we observed no significant differences between wild-type, *c-Rel*<sup>-/-</sup> and *Nfkb2*<sup>-/-</sup> mice. For *c-Rel*<sup>-/-</sup> mice this is entirely consistent with our findings in acute *H. felis* induced gastric pre-neoplasia. However there is a distinct contrast between the two models for *Nfkb2*<sup>-/-</sup> mice as, following *H. felis* infection, *Nfkb2*<sup>-/-</sup> mice were almost entirely protected from gastric epithelial pathology. This contrast suggests that the effects of specific NF-κB subunit deletion on gastric epithelial pathology are mediated through different mechanisms.

## Materials and Methods

### Mice

All murine procedures were performed at the University of Liverpool Biomedical Services Unit in a specific pathogen free research facility under appropriate UK Home Office licensing, and following University of Liverpool Research Ethics Committee approval.

Animals were maintained with a standard 12-hour light/dark cycle and received standard rodent chow and water *ad-libitum* throughout the experimental procedures. Female C57BL/6 wild-type (WT) mice were purchased from Charles River (Margate, UK) and maintained for a minimum 7-day acclimatization prior to use in experiments. *Nfkb1*<sup>-/-</sup>, *Nfkb2*<sup>-/-</sup> and *c-Rel*<sup>-/-</sup> mice (as previously described<sup>26</sup>) were bred and maintained on a C57BL/6 genetic background at the University of Liverpool.

### *Animal procedures*

Tamoxifen (Cayman Chemicals, Cambridge Biosciences, Cambridge, UK) was prepared as previously described in ethanol and corn oil<sup>8</sup>. Groups of 5 female mice aged 10-12 weeks were administered either 150mg/kg tamoxifen, or vehicle via a single intra-peritoneal injection. 72 hours later animals were euthanized by cervical dislocation, and gastric tissues were harvested for histology.

Whole body  $\gamma$ -irradiation was performed by exposure to a Caesium-137 source in a GammaCell closed source irradiator. Groups of 6 female mice aged 10-12 weeks were exposed to a single 12Gy fraction of  $\gamma$ -irradiation. Animals were returned to standard housing conditions prior to being euthanized at 6 or 48 hours post procedure by cervical dislocation. Gastric tissues were harvested for histology. In a separate experiment, similar groups of 3 mice were treated identically prior to cervical dislocation at 6 hours. From these animals, the luminal surface of the stomach was scraped to generate gastric mucosa enriched samples and flash-frozen in liquid nitrogen prior to nucleic acid extraction.

### *Immunohistochemistry*

Standard immunohistochemical techniques were adopted throughout. Heat induced epitope retrieval was performed for all antigens in sodium citrate buffer, pH 6.0. Primary antibodies used were rabbit anti-H<sup>+</sup>/K<sup>+</sup>ATPase (SantaCruz SC-84304), rabbit anti-Ki67 (AB16667, AbCam, Cambridge, UK), rabbit anti- $\gamma$ H2AX (#9718, Cell Signalling, New England Biolabs, Hertfordshire, UK). Secondary

detection of all antibodies was performed using IMMpress anti-rabbit polymer (Vector Laboratories, Peterborough, UK) and SigmaFast 3,3'-diaminobenzidine (DAB) (Sigma-Aldrich, Dorset, UK).

#### *Quantitative histology*

Quantitative histology was performed using previously validated cell positional scoring systems for H+E stained and immunohistochemically stained tissues<sup>27</sup>. Visual analogue scoring of gastric pre-neoplastic lesions was performed as previously described by Rogers *et al*<sup>11</sup>. Cleaved-caspase-3 immunostaining was quantified based on the number of positively stained cells per high powered field. For this score, 10 non-overlapping fields of gastric mucosa were visualized using a x40 objective per tissue section. The number of positively stained cells per high power field was counted, and mean score per section calculated.

#### *Quantitative Real-Time PCR*

Total RNA was extracted and reverse transcribed using the Roche Highpure RNA Tissue kit and Transcriptor reverse transcription kits respectively. Real-Time PCR was performed on a Roche LightCycler 488 instrument, and assays were designed using the Roche Universal Probe Library. Details of primers, probes and amplicons are included in table 1. All real-time PCR reagents were sourced from Roche UK, Burgess Hill, UK.

#### *Statistics*

Statistical analyses were performed using GraphPad Prism 7. Data were analyzed with 2-tailed, 2-way Student's *t*-test, or 2-way analysis of variance (ANOVA) and Dunnett's *post-hoc* analyses as appropriate. Differences in cell positional distributions were assessed using a modified median test as previously described<sup>28</sup>.

#### **Acknowledgements**

We would like to thank Dr Jorge Caamano and Bristol Myers Squibb for donating the *Nfkb2*<sup>-/-</sup> mouse colony, and Dr Jorge Caamano for providing the colonies of *Nfkb1*<sup>-/-</sup> and *c-Rel*<sup>-/-</sup> mice. MDB was funded by a CORE / British Society of Gastroenterology Development Grant and Wellcome Trust / University of Liverpool Institutional Strategic Support Fund grant under grant agreement number: 097826/Z/11/Z. MDB and DMP were supported by a North West Cancer Research project grant. MDB, JMW, RH and DMP were supported by the European Council's Seventh Framework Programme (FP7/2007-2013) under grant agreement number 305564 (SysmedIBD).

# **Conflict of interests**

The authors declare no conflicts of interest.

# **References**

1. Graham DY. Helicobacter pylori update: gastric cancer, reliable therapy, and possible benefits. *Gastroenterology* 2015, **148**(4): 719-731 e713.
2. Correa P, Haenszel W, Cuello C, Tannenbaum S, Archer M. A model for gastric cancer epidemiology. *The Lancet* 1975, **306**(7924): 58-60.
3. Fox JG, Sheppard BJ, Dangler CA, Whary MT, Ihrig M, Wang TC. Germ-Line p53-targeted Disruption Inhibits Helicobacter-induced Premalignant Lesions and Invasive Gastric Carcinoma through Down-Regulation of Th1 Proinflammatory Responses. *Cancer Research* 2002, **62**(3): 696-702.
4. Burkitt MD, Duckworth CA, Williams JM, Pritchard DM. Helicobacter pylori-induced gastric pathology: insights from in vivo and ex vivo models. *Disease models & mechanisms* 2017, **10**(2): 89-104.
5. Merga YJ, O'Hara A, Burkitt MD, Duckworth CA, Probert CS, Campbell BJ, *et al.* Importance of the alternative NF-kappaB activation pathway in inflammation-associated gastrointestinal carcinogenesis. *Am J Physiol Gastrointest Liver Physiol* 2016, **310**(11): G1081-1090.
6. Burkitt MD, Williams JM, Duckworth CA, O'Hara A, Hanedi A, Varro A, *et al.* Signaling mediated by the NF-kappaB sub-units NF-kappaB1, NF-kappaB2 and c-Rel differentially



- 382 regulate *Helicobacter felis*-induced gastric carcinogenesis in C57BL/6 mice. *Oncogene* 2013,  
383 **32**(50): 5563-5573.
- 384
- 385 7. Williams JM, Duckworth CA, Watson AJ, Frey MR, Miguel JC, Burkitt MD, *et al.* A mouse  
386 model of pathological small intestinal epithelial cell apoptosis and shedding induced by  
387 systemic administration of lipopolysaccharide. *Disease models & mechanisms* 2013, **6**(6):  
388 1388-1399.
- 389
- 390 8. Huh WJ, Khurana SS, Geahlen JH, Kohli K, Waller RA, Mills JC. Tamoxifen induces rapid,  
391 reversible atrophy, and metaplasia in mouse stomach. *Gastroenterology* 2012, **142**(1): 21-24  
392 e27.
- 393
- 394 9. Sigal M, Rothenberg ME, Logan CY, Lee JY, Honaker RW, Cooper RL, *et al.* *Helicobacter pylori*  
395 Activates and Expands Lgr5(+) Stem Cells Through Direct Colonization of the Gastric Glands.  
396 *Gastroenterology* 2015, **148**(7): 1392-1404.e1321.
- 397
- 398 10. Saenz JB, Burclaff J, Mills JC. Modeling Murine Gastric Metaplasia Through Tamoxifen-  
399 Induced Acute Parietal Cell Loss. *Methods Mol Biol* 2016, **1422**: 329-339.
- 400
- 401 11. Rogers AB. Histologic scoring of gastritis and gastric cancer in mouse models. *Methods Mol*  
402 *Biol* 2012, **921**: 189-203.
- 403
- 404 12. Phillips DH. Understanding the genotoxicity of tamoxifen? *Carcinogenesis* 2001, **22**(6): 839-  
405 849.
- 406
- 407 13. Hu R, Hilakivi-Clarke L, Clarke R. Molecular mechanisms of tamoxifen-associated endometrial  
408 cancer (Review). *Oncol Lett* 2015, **9**(4): 1495-1501.
- 409
- 410 14. Przemeck SMC, Duckworth CA, Pritchard DM. Radiation-induced gastric epithelial apoptosis  
411 occurs in the proliferative zone and is regulated by p53, bak, bax, and bcl-2. *Am J Physiol*  
412 *Gastrointest Liver Physiol* 2007, **292**(2): G620-627.
- 413
- 414 15. Wang CY, Mayo MW, Korneluk RG, Goeddel DV, Baldwin AS, Jr. NF-kappaB antiapoptosis:  
415 induction of TRAF1 and TRAF2 and c-IAP1 and c-IAP2 to suppress caspase-8 activation.  
416 *Science* 1998, **281**(5383): 1680-1683.
- 417
- 418 16. Van Themsche C, Chaudhry P, Leblanc V, Parent S, Asselin E. XIAP gene expression and  
419 function is regulated by autocrine and paracrine TGF-beta signaling. *Mol Cancer* 2010, **9**:  
420 216.
- 421
- 422 17. Liu F, Bardhan K, Yang D, Thangaraju M, Ganapathy V, Waller JL, *et al.* NF-kappaB directly  
423 regulates Fas transcription to modulate Fas-mediated apoptosis and tumor suppression. *J*  
424 *Biol Chem* 2012, **287**(30): 25530-25540.

425

18. Novac N, Baus D, Dostert A, Heinzel T. Competition between glucocorticoid receptor and NFkappaB for control of the human FasL promoter. *FASEB J* 2006, **20**(8): 1074-1081.
19. Wang X, Belguise K, Kersual N, Kirsch KH, Mineva ND, Galtier F, *et al.* Oestrogen signalling inhibits invasive phenotype by repressing RelB and its target BCL2. *Nat Cell Biol* 2007, **9**(4): 470-478.
20. Yu M, Tong X, Qi B, Qu H, Dong S, Yu B, *et al.* Berberine enhances chemosensitivity to irinotecan in colon cancer via inhibition of NFkappaB. *Mol Med Rep* 2014, **9**(1): 249-254.
21. Iannetti A, Ledoux AC, Tudhope SJ, Sellier H, Zhao B, Mowla S, *et al.* Regulation of p53 and Rb links the alternative NF-kappaB pathway to EZH2 expression and cell senescence. *PLoS Genet* 2014, **10**(9): e1004642.
22. Wang Y, Meng A, Lang H, Brown SA, Konopa JL, Kindy MS, *et al.* Activation of Nuclear Factor kappaB In vivo Selectively Protects the Murine Small Intestine against Ionizing Radiation-Induced Damage. *Cancer Res* 2004, **64**(17): 6240-6246.
23. Poltz R, Naumann M. Dynamics of p53 and NF-kappaB regulation in response to DNA damage and identification of target proteins suitable for therapeutic intervention. *BMC Syst Biol* 2012, **6**: 125.
24. Rehemtulla A, Hamilton CA, Chinnaiyan AM, Dixit VM. Ultraviolet radiation-induced apoptosis is mediated by activation of CD-95 (Fas/APO-1). *J Biol Chem* 1997, **272**(41): 25783-25786.
25. Bang B, Gniadecki R, Larsen JK, Baadsgaard O, Skov L. In vivo UVB irradiation induces clustering of Fas (CD95) on human epidermal cells. *Exp Dermatol* 2003, **12**(6): 791-798.
26. Burkitt MD, Hanedi AF, Duckworth CA, Williams JM, Tang JM, O'Reilly LA, *et al.* NF-kappaB1, NF-kappaB2 and c-Rel differentially regulate susceptibility to colitis-associated adenoma development in C57BL/6 mice. *The Journal of pathology* 2015, **236**(3): 326-336.
27. Duckworth CA, Burkitt MD, Williams JM, Parsons BN, Tang JM, Pritchard DM. Murine Models of Helicobacter (pylori or felis)-associated Gastric Cancer. *Curr Protoc Pharmacol* 2015, **69**: 14 34 11-35.
28. Ijiri K, Potten CS. Response of intestinal cells of differing topographical and hierarchical status to ten cytotoxic drugs and five sources of radiation. *Br J Cancer* 1983, **47**(2): 175-185.

#### Figure Legends:

**Figure 1:** Representative photomicrographs of gastric corpus of WT, *Nfkb1*<sup>-/-</sup>, *Nfkb2*<sup>-/-</sup> and *c-Rel*<sup>-/-</sup> mice treated with vehicle or 150mg/kg tamoxifen for 72h. Sections stained with hematoxylin and eosin, or immunostained for expression of H<sup>+</sup>/K<sup>+</sup>ATPase. Scale bars 100µm.

**Figure 2:** Tamoxifen induced epithelial lesions in WT, *Nfkb1*<sup>-/-</sup>, *Nfkb2*<sup>-/-</sup> and *c-Rel*<sup>-/-</sup> mice. A: visual analogue scoring of pathology identified in H+E stained sections from mice treated with vehicle or 150mg/kg tamoxifen. B: percentage of gastric corpus epithelial cells expressing H<sup>+</sup>/K<sup>+</sup>ATPase in mice treated with vehicle or 150mg/kg tamoxifen. For A and B statistically significant differences tested by 2-way ANOVA and Dunnett's test. \*\* *p*<0.01, \*\*\* *p*<0.001, \*\*\*\* *p*<0.0001. C-F: H<sup>+</sup>/K<sup>+</sup>ATPase positive cells plotted by cell position in the gastric corpus hemiglands of WT (C), *Nfkb1*<sup>-/-</sup> (D), *Nfkb2*<sup>-/-</sup> (E) and *c-Rel*<sup>-/-</sup> (F) mice. Solid line represents distribution of cells in vehicle treated mice, broken line tamoxifen treated mice. Shaded area marks region of gland where distribution of H<sup>+</sup>/K<sup>+</sup>ATPase positive cells differs significantly in tamoxifen treated vs vehicle treated mice, *p*<0.05 by modified median test. N=5 for all experimental groups.

**Figure 3:** Gastric corpus epithelial cell turnover following tamoxifen administration in WT, *Nfkb1*<sup>-/-</sup>, *Nfkb2*<sup>-/-</sup> and *c-Rel*<sup>-/-</sup> mice. A: Representative photomicrographs of gastric corpus of WT, *Nfkb1*<sup>-/-</sup>, *Nfkb2*<sup>-/-</sup> and *c-Rel*<sup>-/-</sup> mice treated with 150mg/kg tamoxifen for 72h. Sections immunostained for expression of cleaved caspase-3 or Ki67. Scale bars 100µm. B: Number of cleaved-caspase 3 positive cells identified per high power field in mice treated with vehicle or 150mg/kg tamoxifen. C: percentage of gastric corpus epithelial cells expressing Ki67 in mice treated with vehicle or 150mg/kg tamoxifen. For B and C statistically significant differences tested by 2-way ANOVA and Dunnett's test. \* *p*<0.05, \*\* *p*<0.01, \*\*\*\* *p*<0.0001. C-F: Ki67 positive cells plotted by cell position in the gastric corpus hemiglands of WT (D), *Nfkb1*<sup>-/-</sup> (E), *Nfkb2*<sup>-/-</sup> (F) and *c-Rel*<sup>-/-</sup> (G) mice. Solid line represents distribution of cells in vehicle treated mice, broken line tamoxifen treated mice. Shaded area marks region of gland where distribution of Ki67 positive cells differs significantly in tamoxifen treated vs vehicle treated mice, *p*<0.05 by modified median test. N=5 for all experimental groups.

**Figure 4:** Gastric corpus expression of  $\gamma$ -H2AX following tamoxifen administration in WT, *Nfkb1*<sup>-/-</sup>, *Nfkb2*<sup>-/-</sup> and *c-Rel*<sup>-/-</sup> mice. A: Representative photomicrographs of gastric corpus of WT, *Nfkb1*<sup>-/-</sup>, *Nfkb2*<sup>-/-</sup> and *c-Rel*<sup>-/-</sup> mice treated with 150mg/kg tamoxifen for 72h. Sections immunostained for expression of  $\gamma$ -H2AX. Scale bars 100 $\mu$ m. B: percentage of gastric corpus gland cells expressing  $\gamma$ -H2AX in mice treated with vehicle or 150mg/kg tamoxifen. Statistically significant differences tested by 2-way ANOVA and Dunnett's test. \*\*  $p < 0.01$ , \*\*\*  $p < 0.001$ . B-E:  $\gamma$ -H2AX positive cells plotted by cell position in the gastric corpus hemiglands of WT (C), *Nfkb1*<sup>-/-</sup> (D), *Nfkb2*<sup>-/-</sup> (E) and *c-Rel*<sup>-/-</sup> (F) mice. Solid line represents distribution of cells in vehicle treated mice, broken line tamoxifen treated mice. Shaded area marks region of gland where distribution of  $\gamma$ -H2AX cells differs significantly in tamoxifen treated vs vehicle treated mice,  $p < 0.05$  by modified median test. N=5 for all groups.

**Figure 5:** Impact of NF- $\kappa$ B1 deletion on gastric gland length (A+B), number of gastric epithelial cells undergoing mitosis (C+D) and location of mitoses within the gastric gland (E+F) of untreated mice. A, C and E represent events in the gastric antral mucosa, B, D and F show data from the gastric corpus. Statistically significant differences tested by Student's 2-tailed unpaired *t*-test for A-D, \*  $p < 0.05$ , \*\*  $p < 0.01$ , \*\*\*\*  $p < 0.0001$ . E and F: Solid line represents distribution of mitotic cells in WT mice, broken line *Nfkb1*<sup>-/-</sup> mice. Shaded area marks region of gland where distribution of mitotic cells differs significantly in WT vs *Nfkb1*<sup>-/-</sup> mice,  $p < 0.05$  by modified median test. N=6 for all experimental groups.

**Figure 6:** Impact of NF- $\kappa$ B1 deletion on gastric epithelial apoptosis in untreated and 12Gy  $\gamma$ -irradiated mice 6 and 48-hours after irradiation. A+B: Representative images of gastric corpus and antrum respectively stained with H+E, inset image highlights apoptotic epithelial cells. Scale bars 100 $\mu$ m. C+D: percentage of gastric epithelial cells undergoing apoptosis in gastric antrum and corpus respectively. Statistically significant differences tested by 2-way ANOVA and Dunnett's test. \*  $p < 0.05$ , \*\*\*  $p < 0.001$ . E-J: Apoptotic cells plotted by cell position in the gastric antrum (E, G and I) and corpus (F, H and J) of untreated and irradiated WT and *Nfkb1*<sup>-/-</sup> mice. Solid lines represent distribution of cells in WT mice, broken lines *Nfkb1*<sup>-/-</sup> mice. Shaded areas mark regions of glands

518 where distribution of apoptotic cells differs significantly in WT vs *Nfkb1*<sup>-/-</sup> mice,  $p < 0.05$  by modified  
519 median test. N=6 for all experimental groups.

520 **Figure 7:** Relative gene expression of specified regulators of apoptosis under transcriptional  
521 regulation of NF- $\kappa$ B signaling. Filled bars represent untreated mice, open bars animals culled 6 hours  
522 after 12Gy  $\gamma$ -irradiation. Mean and standard deviation of Log<sub>2</sub> transformed relative abundance for  
523 each transcript are plotted. Statistically significant differences tested by 2-way ANOVA and Dunnett's  
524 test, \*  $p < 0.05$ , \*\*  $p < 0.01$ , \*\*\*  $p < 0.001$ . N=3 for all experimental groups.

525

526 **Tables:**

527 **Table 1:** Primers, probes and amplicons for quantitative PCR assays.

| Target |                    | Forward Primer                 | Reverse Primer              | UPL Probe | Amplicon (bp) | Intron (bp) |
|--------|--------------------|--------------------------------|-----------------------------|-----------|---------------|-------------|
| Fas    | ENSMUSG00000024778 | TGC-AGA-CAT-GCT-GTG-GAT-CT     | CTT-AAC-TGT-GAG-CCA-GCA-AGC | #34       | 60            | 16377       |
| FasL   | ENSMUSG00000000817 | ACC-GGT-GGT-ATT-TTT-CAT-GG     | AGG-CTT-TGG-TTG-GTG-AAC-TC  | #21       | 117           | 791         |
| c-IAP1 | ENSMUSG00000057367 | GAA-GAA-AAT-GCT-GAC-CCT-ACA-GA | CAT-GAC-GAC-ATC-TTC-CGA-AC  | #80       | 72            | 4393        |
| c-IAP2 | ENSMUSG00000032000 | GGG-GAC-GAT-TTA-AAG-GTA-TCG    | TCG-GTT-TTA-CTG-CTA-GGC-TGA | #5        | 139           | 11412       |
| XIAP   | ENSMUSG00000025860 | GCT-TGC-AAG-AGC-TGG-ATT-TT     | TGG-CTT-CCA-ATC-CGT-GAG     | #25       | 88            | 1334        |
| p53    | ENSMUSG00000059552 | ATG-CCC-ATG-CTA-CAG-AGG-AG     | AGA-CTG-GCC-CTT-CTT-GGT-CT  | #78       | 74            | 585         |
| Bcl-2  | ENSMUSG00000057329 | GTA-CCT-GAA-CCG-GCA-TCT-G      | GGG-GCC-ATA-TAG-TTC-CAC-AA  | #75       | 76            | 168904      |
| Bcl-xL | ENSMUSG00000007659 | TGA-CCA-CCT-AGA-GCC-TTG-GA     | TGT-TCC-CGT-AGA-GAT-CCA-CAA | #2        | 68            | 47142       |
| GAPDH  | ENSMUSG00000057666 | GGG-TTC-CTA-TAA-ATA-CGG-ACT-GC | CCA-TTT-TGT-CTA-CGG-GAC-GA  | #52       | 112           | 240         |

528

529

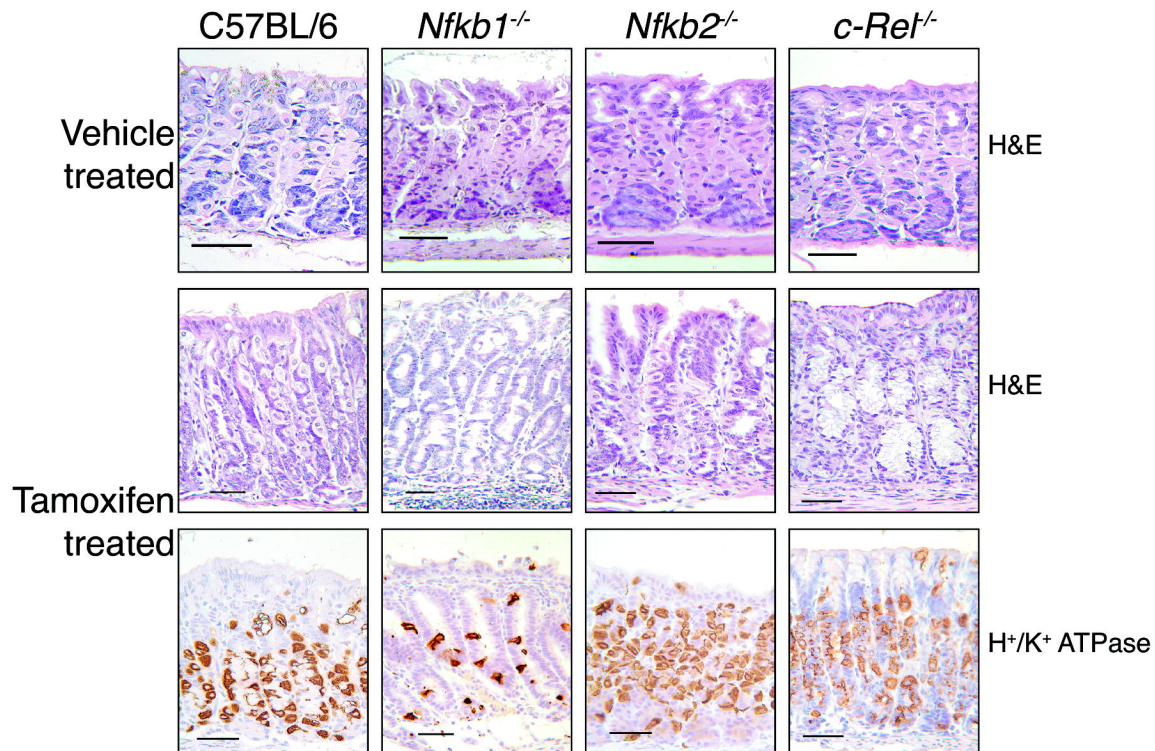

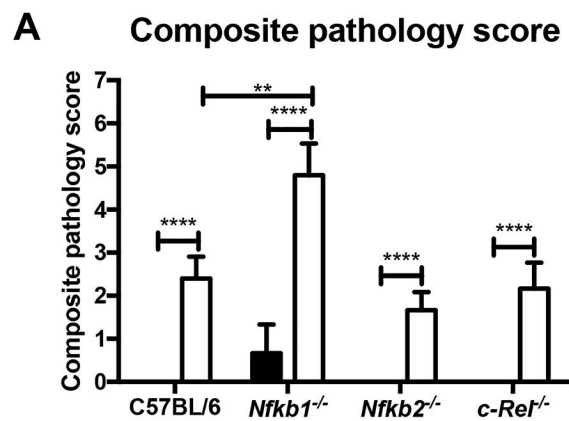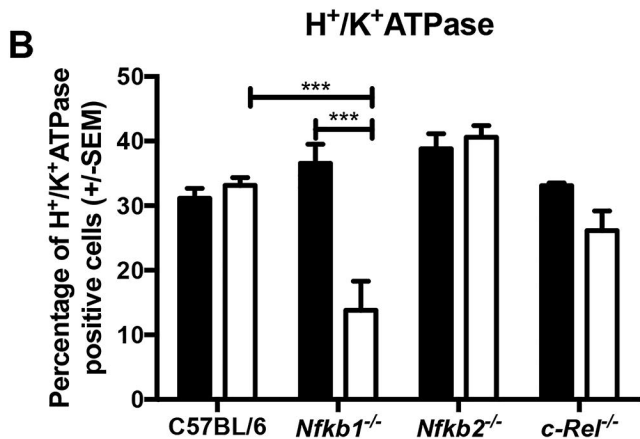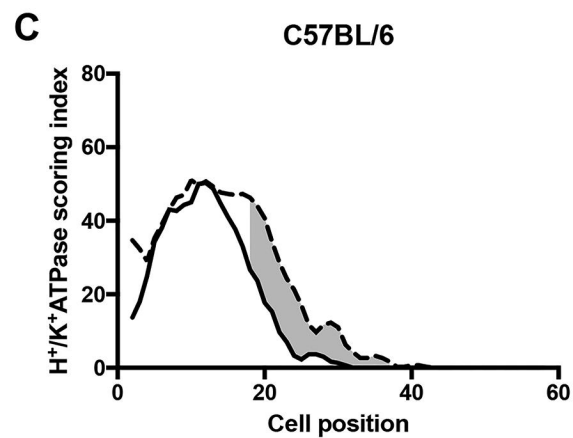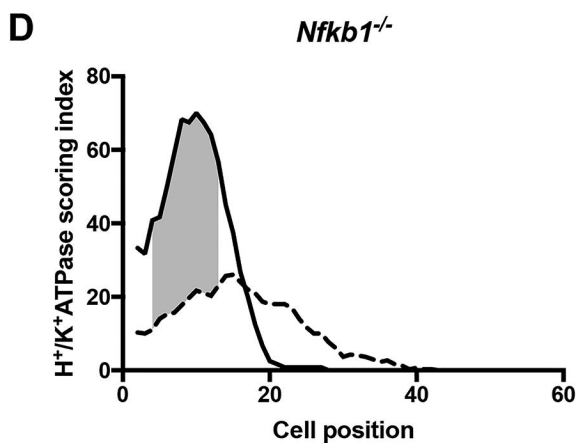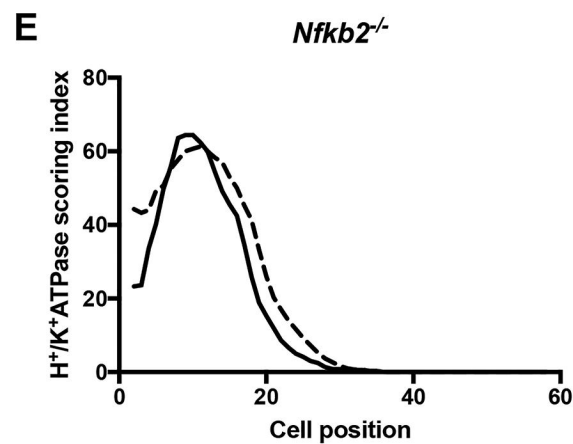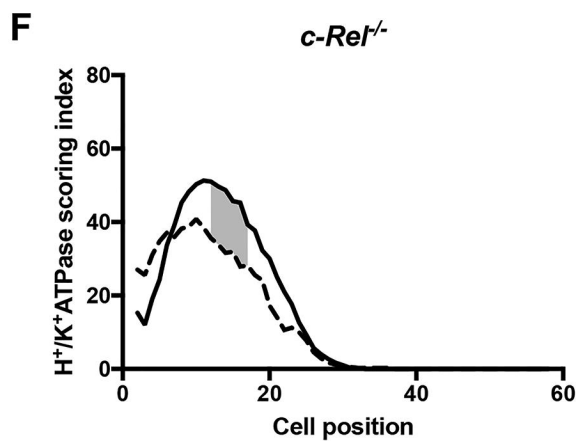

■ Vehicle treated

□ Tamoxifen treated

— Vehicle treated

- - - Tamoxifen treated



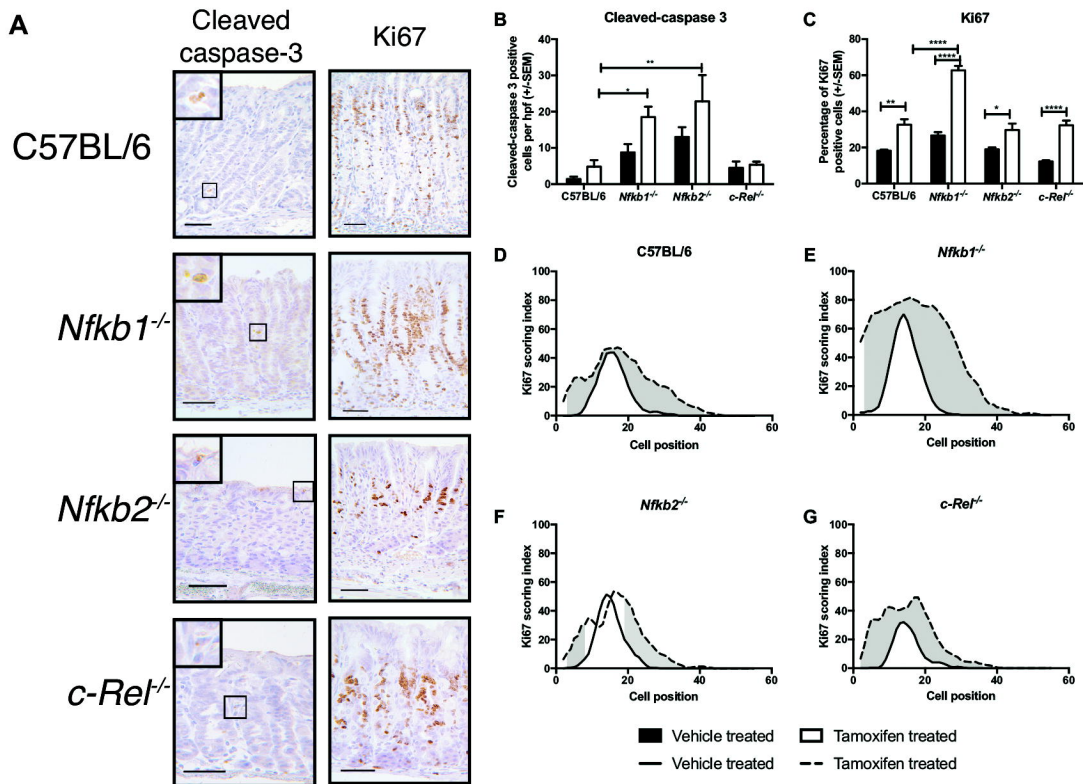



**A**

C57BL/6

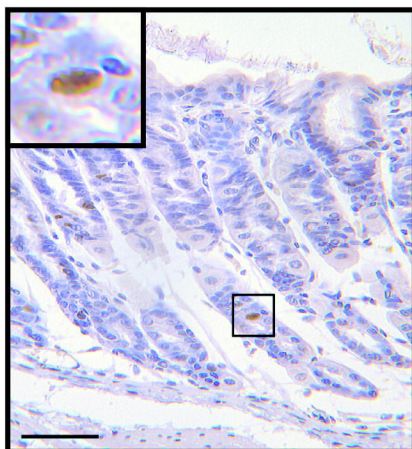*Nfkb1*<sup>-/-</sup>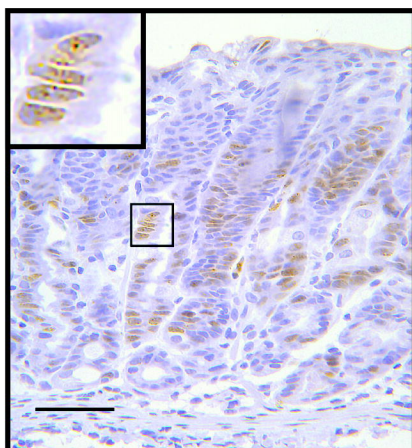*Nfkb2*<sup>-/-</sup>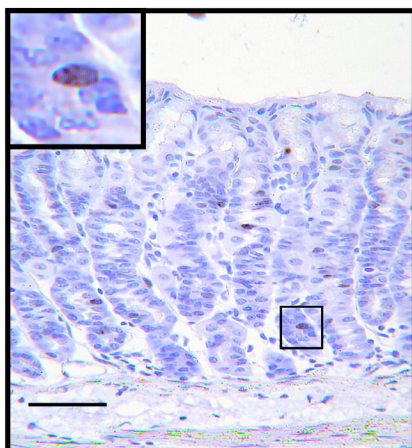*c-Rel*<sup>-/-</sup>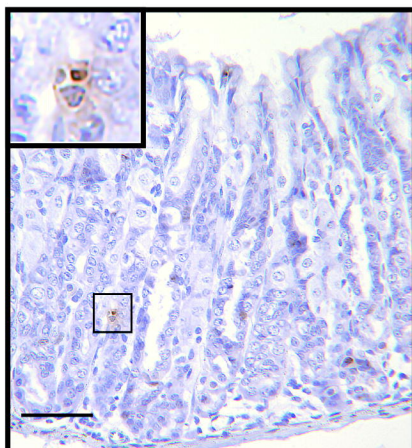**B**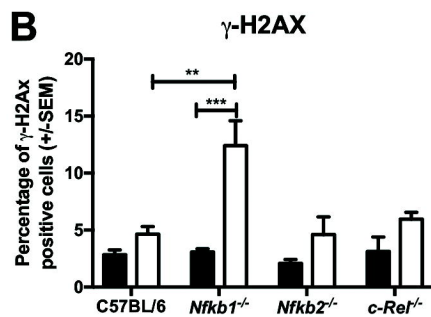**C**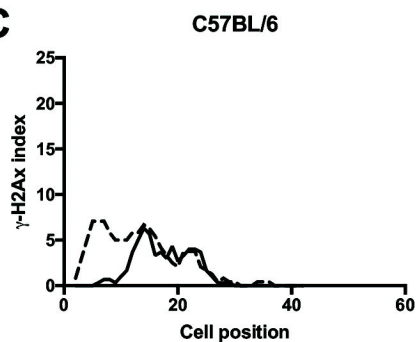**D**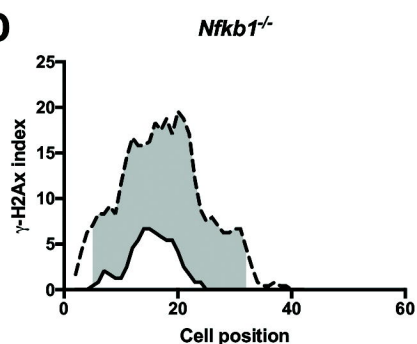**E**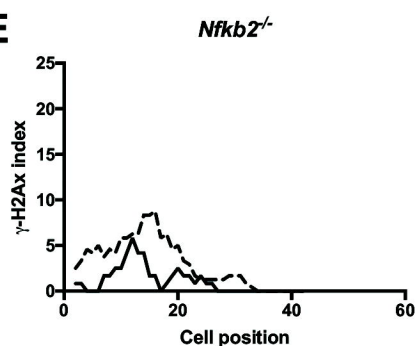**F**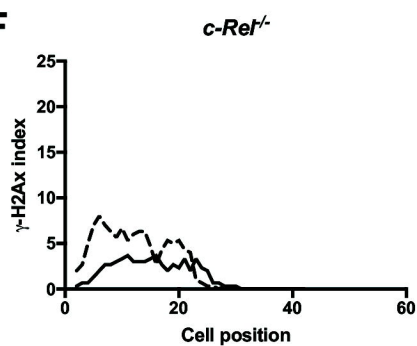

Vehicle treated
  Tamoxifen treated

Vehicle treated
  Tamoxifen treated

Antrum

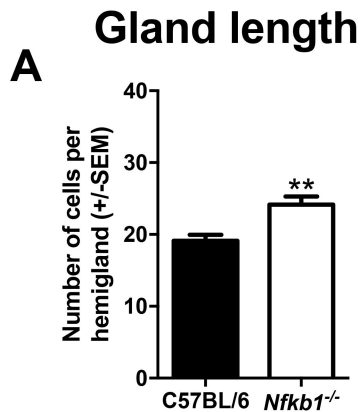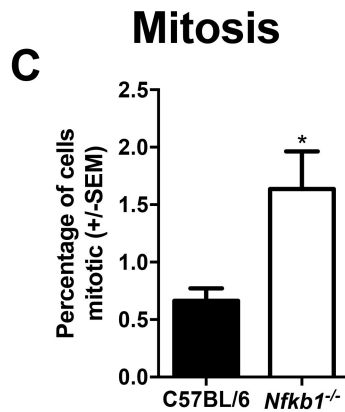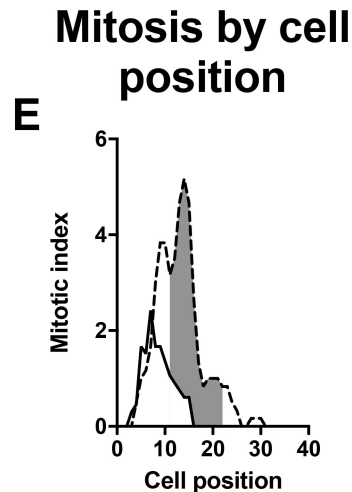

Corpus

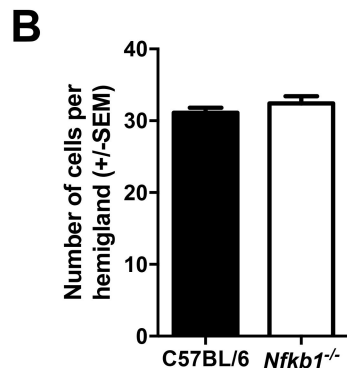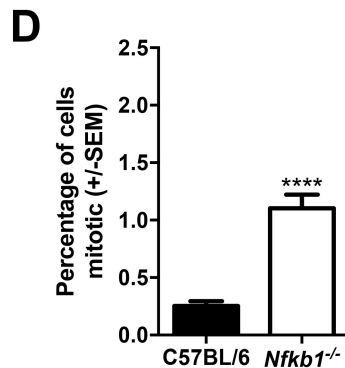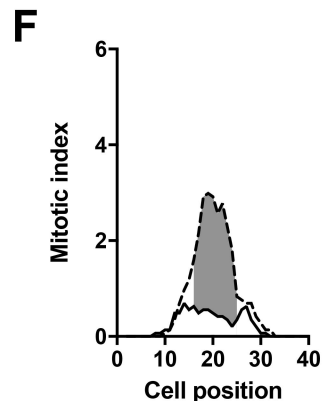

■ C57BL/6 □ *Nfkb1*<sup>-/-</sup> — C57BL/6 - - *Nfkb1*<sup>-/-</sup>

**A**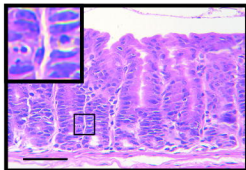**B**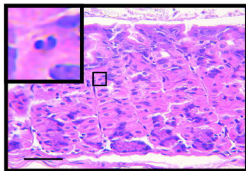**Apoptosis****C**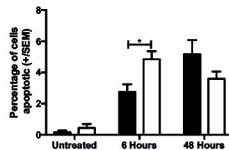**D**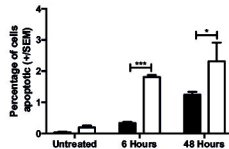**E**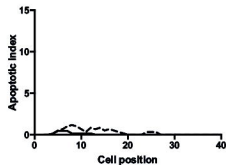**F**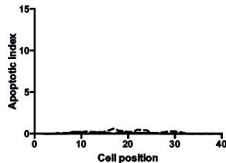**6 hours****G**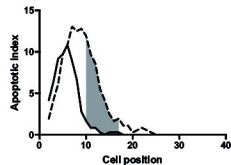**H**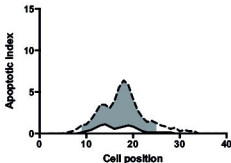**48 hours****I**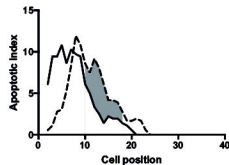**J**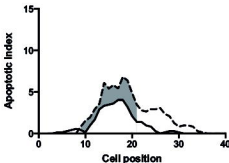

C57BL/6
  *Nfkb1*<sup>-/-</sup>
 C57BL/6
  *Nfkb1*<sup>-/-</sup>

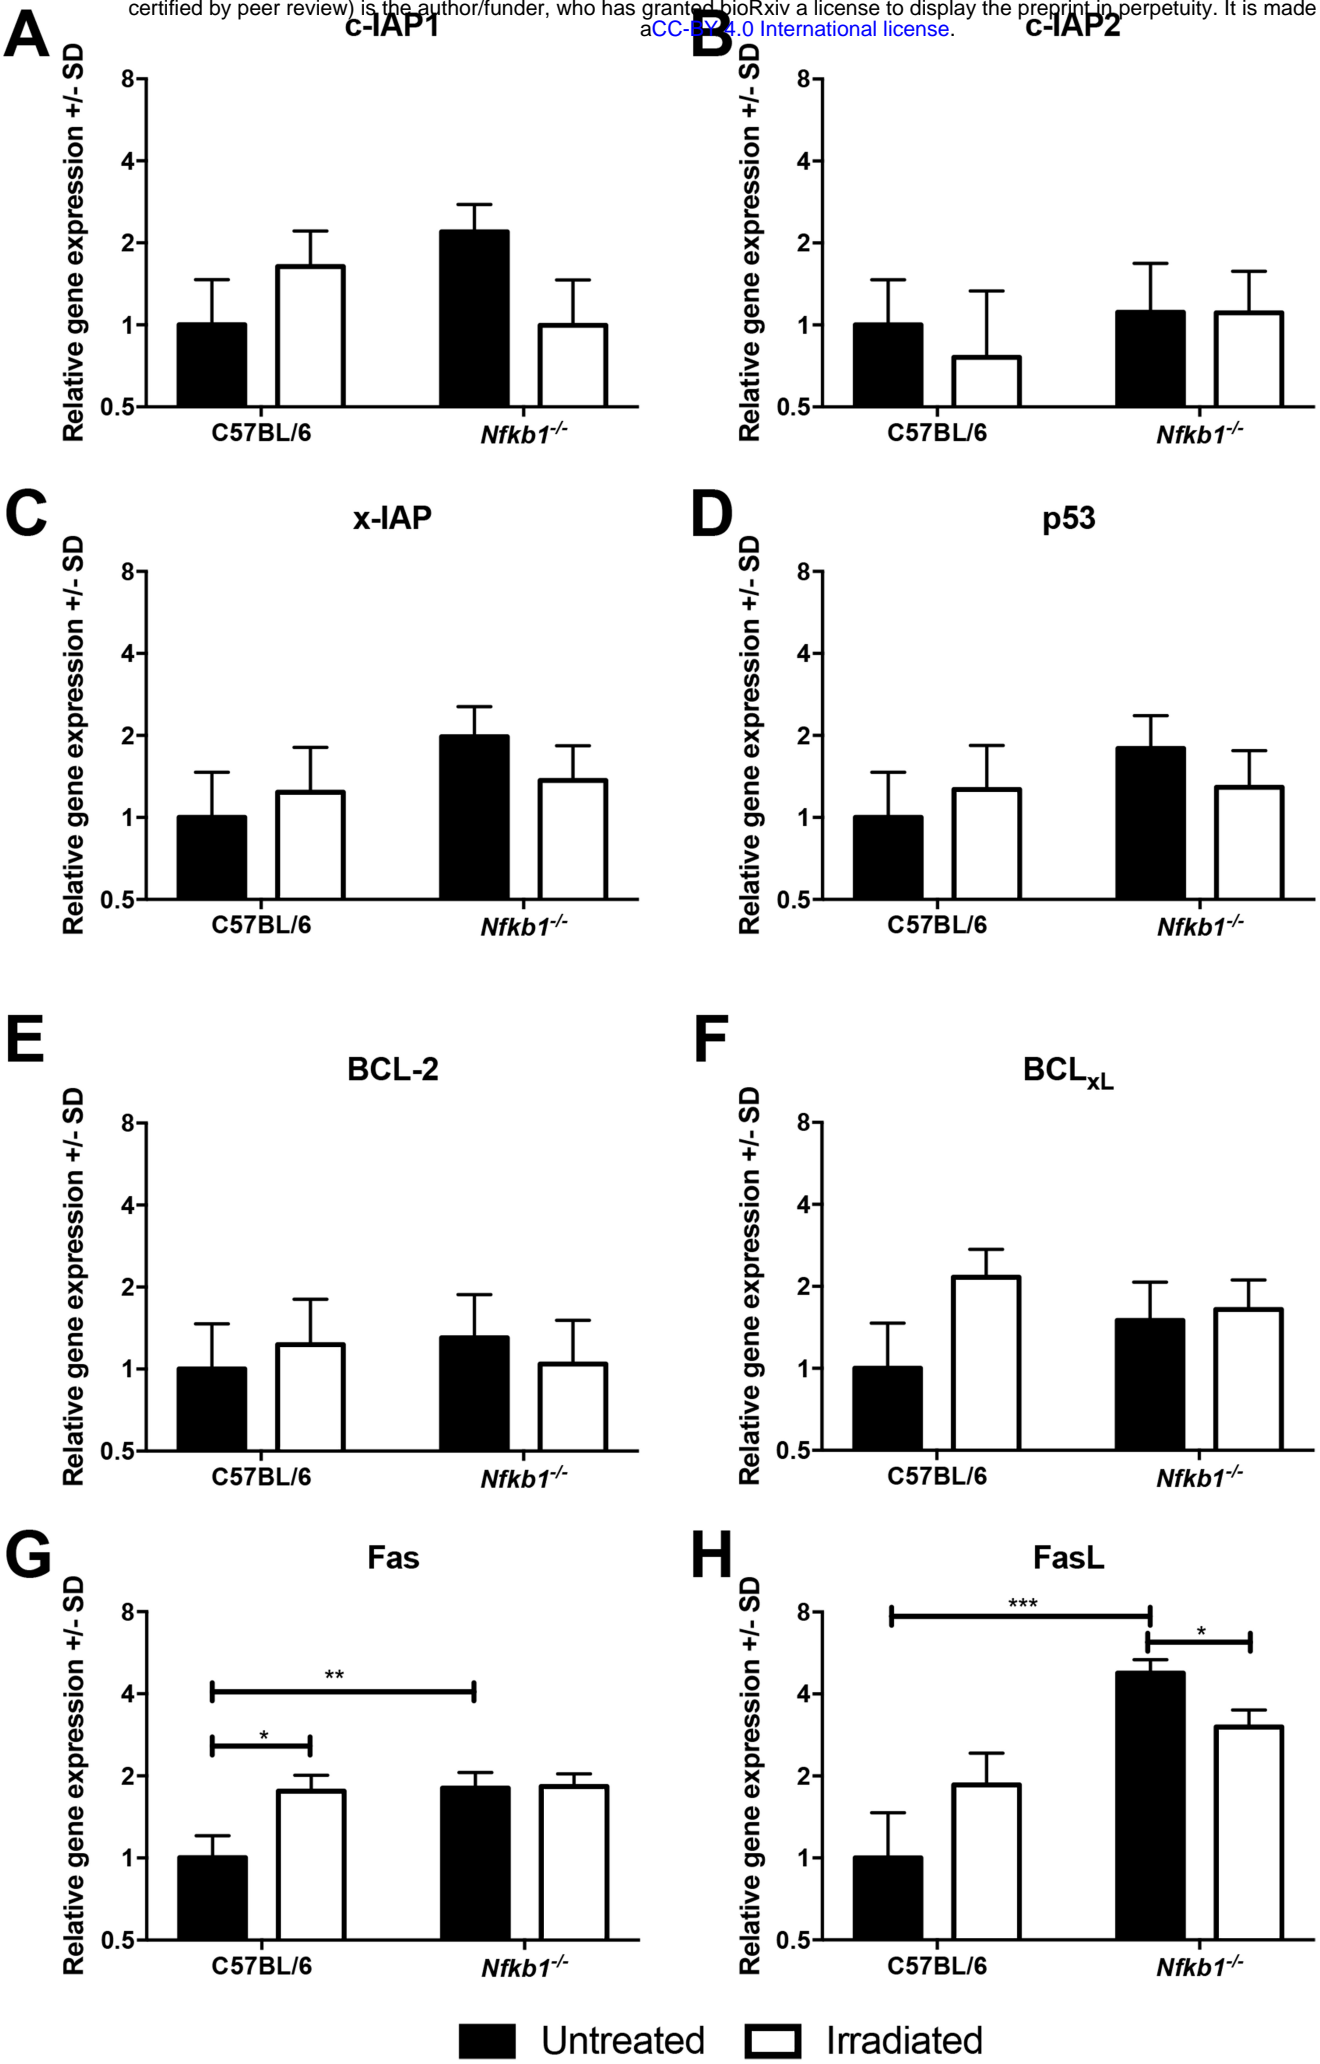

Source: http://biorxiv.org/content/10.1101/112656v1.full.pdf
